# Supplementary material
Source: publisher figshare collection journal article supplement (https://geolsoc.figshare.com/ndownloader/files/14358029)
Supplement: Supplementary file 1 [file 14358029]

| **Lithostratigraphic unit** | **Suggested research** | **Objectives** |
| --- | --- | --- |
| Western Province | Geochemistry/petrography of Takaka and Buller Terranes | Better characterize possible changes in tectonic setting |
| Brook Street Terrane | U-Pb whole-rock & detrital zircon dating of intermediate/felsic rocks  (e.g. Grampian Fm., Nelson area);  More Nd isotopic analysis | Test if older Gondwana-derived zircons are present, relevant to tectonic setting;  Determine crustal type |
| Dun Mountain Ophiolite | U-Pb dating of e.g. gabbroic rocks;  More dating of intrusives | Test if plagiogranite ages are  representative |
| Patuki and Croisilles Melanges | Petrographic and chemical studies of mafic and ultramafic rocks;  U-Pb detrital dating of ‘matrix’ sediments | Test correlation with Dun Mountain Ophiolite;  Compare provenance with Permian of Maitai Group |
| Maitai Group | Sedimentology of pristine Alpine sections (helicopter access needed);  U-Pb detrital zircon dating of additional formations (e.g. Wooded Peak Formation);  Ramon spectrography of lawsonite | Improved understanding of depositional environments;  Test if provenance in Wooded Peak is like Tramway Formation (existing data);  Better understanding of local HP-LT metamorphism |
| Murihiku Terrane | Sedimentary logging and facies analysis; more Nd isotopic analysis  of clasts and sediments | Refine knowledge of depositional settings & provenance in different areas |
| Caples Terrane | Structural studies focused on key boundaries to assess stratigraphic vs. tectonic nature (e.g. using short bore holes);  Further study of mélange units | Test fore-arc vs. accretionary interpretations; check apparent absence of Permian detrital zircons  Test e.g. MORB vs. OIB origins |
| Rakaia Terrane | Rare earth element analysis of clastic sediments; more dating of  metamorphism where possible. | Closer comparison with Maitai and Caples clastic sediments;  Better define timing of collsions |
| Eastern Province generally | Micro-structural analysis; fault  analysis | Better understanding e.g. of accretion vs. strike-slip and Cenozoic deformation |
